# Supplementary material
Source: publisher figshare collection journal article supplement (https://tandf.figshare.com/ndownloader/files/18004283)

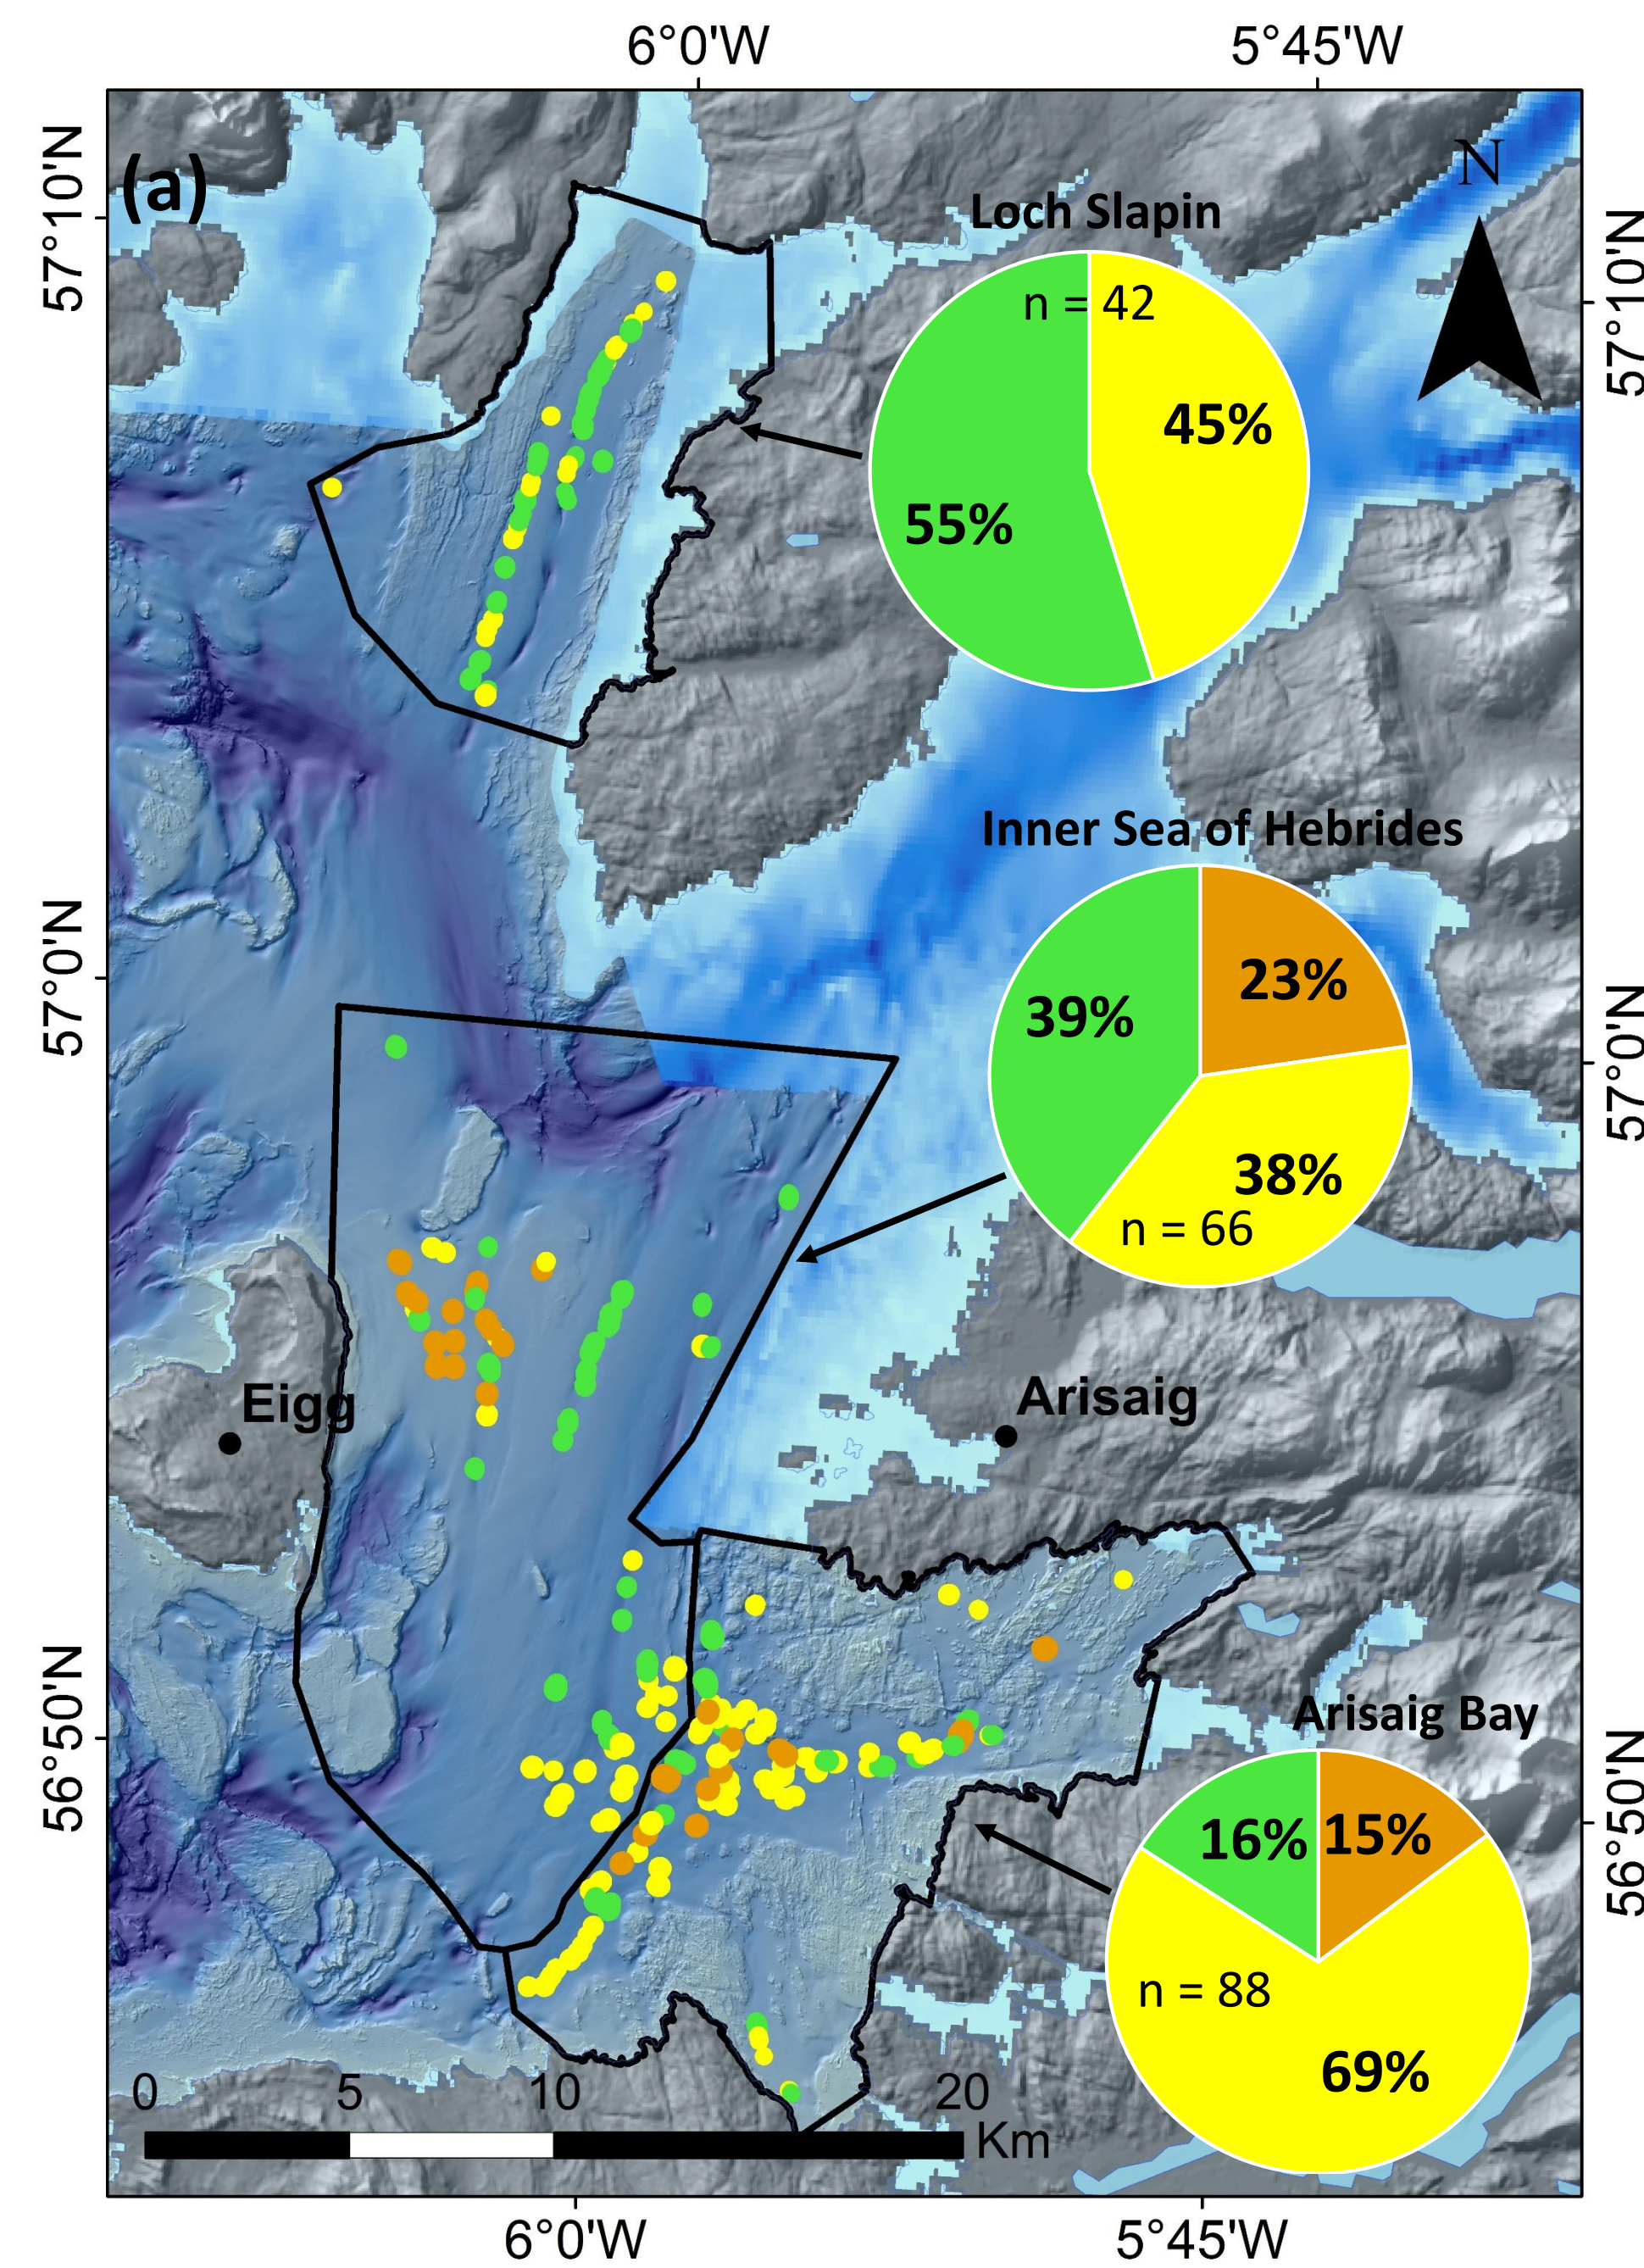

## Distribution and classification of pockmarks on the seabed around western Scotland

Audsley, A., Bradwell, T., Howe, J., Baxter, J.

Map showing the main regions of pockmarks fields in the coastal waters of western Scotland where high resolution bathymetry is available. Pie charts display the percentages of different pockmark classes found within that area.

Contains Ordnance Survey data © Crown copyright and database right 2018  
© British Crown and OceanWise, 2019. All rights reserved. Licence No. EK001-20180802.  
Not to be used for Navigation.

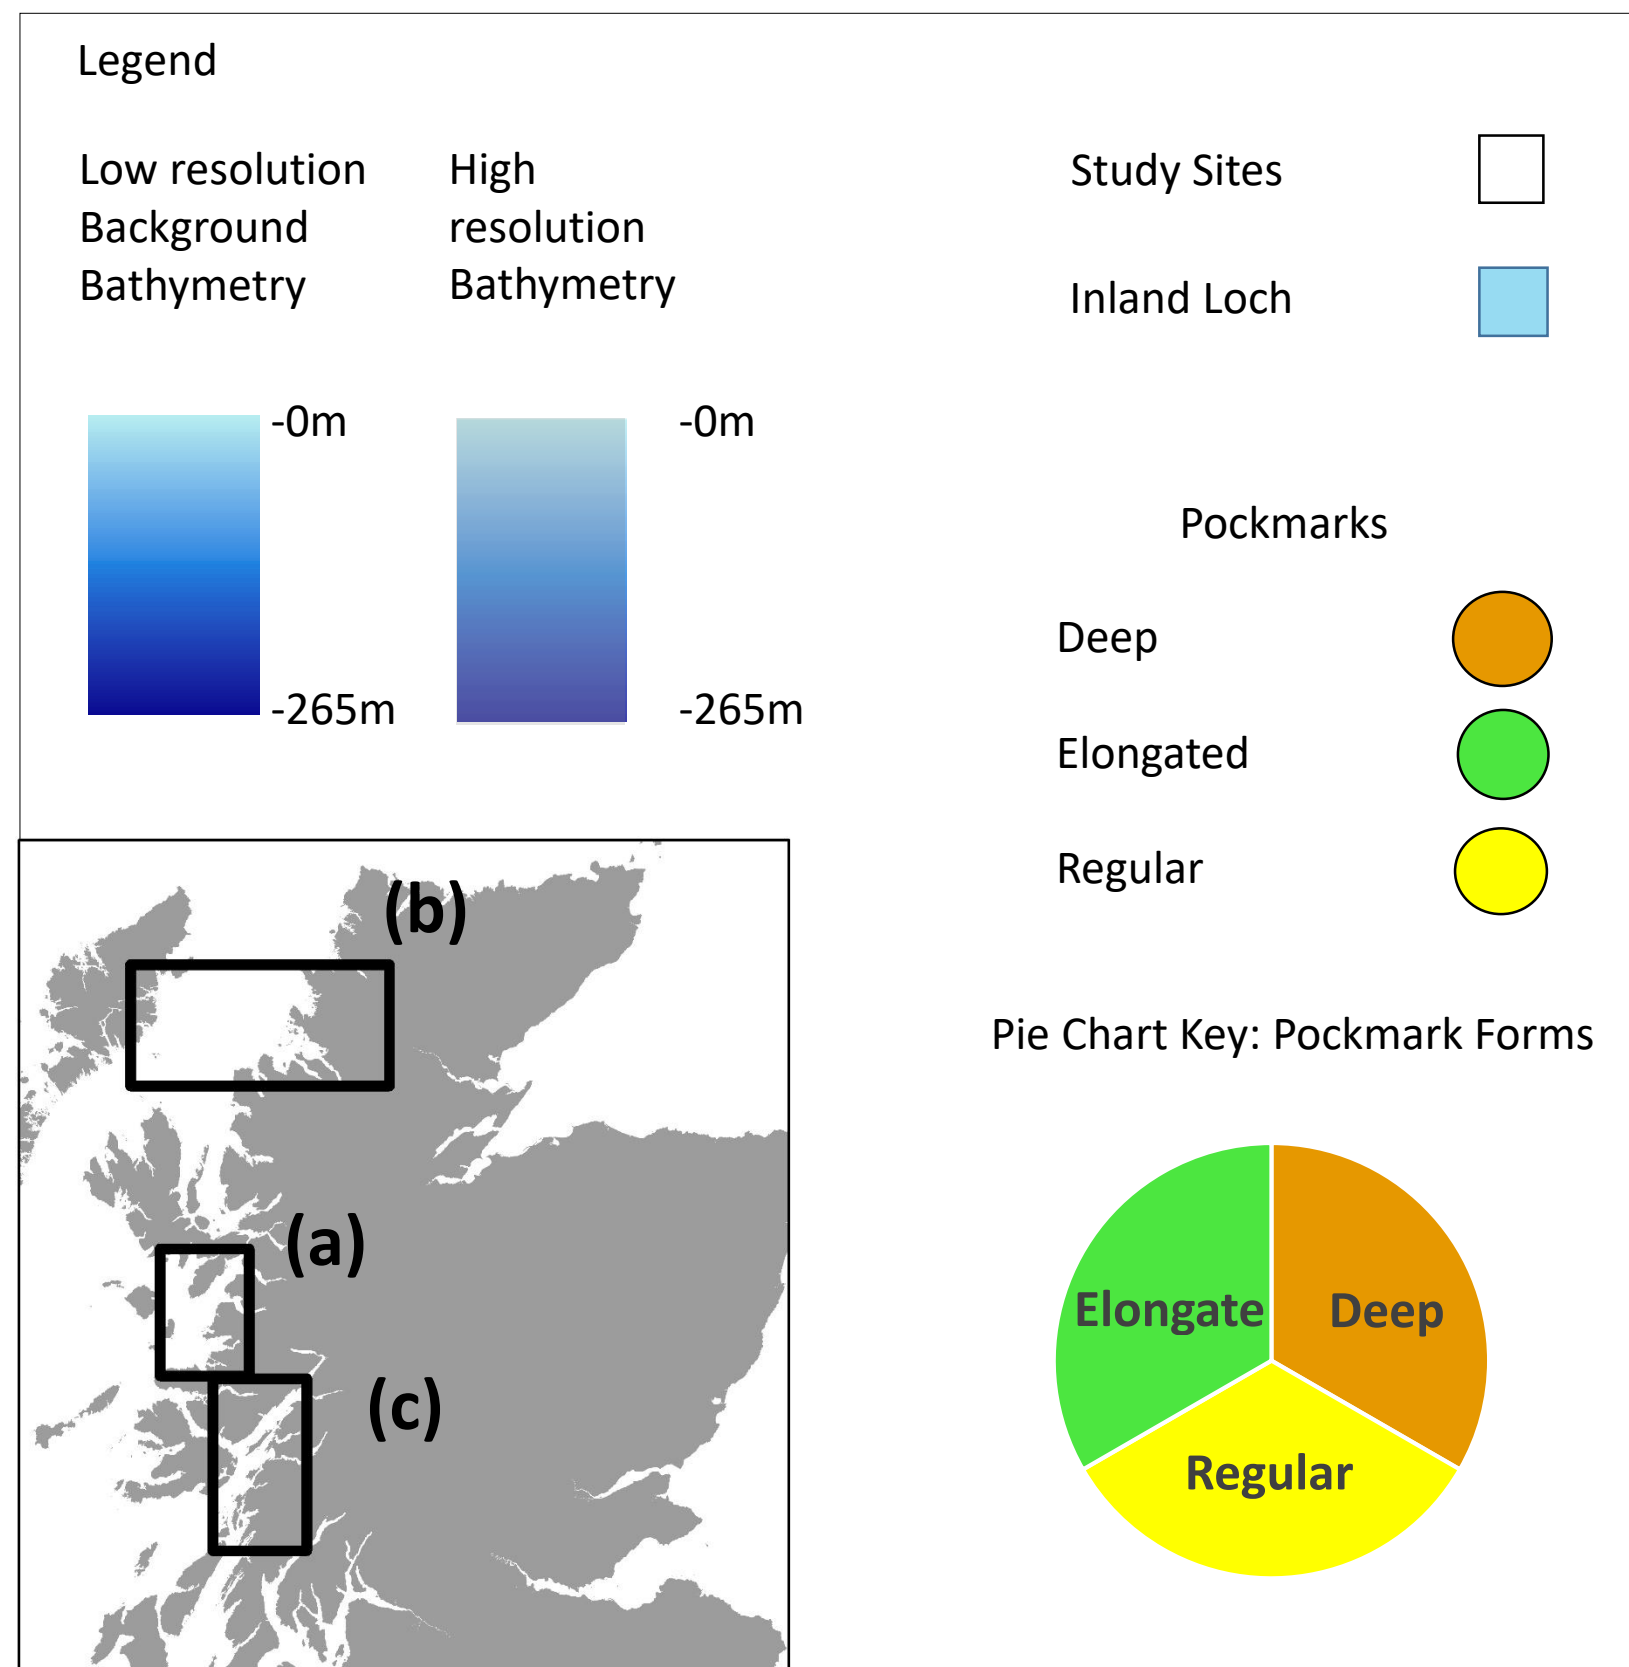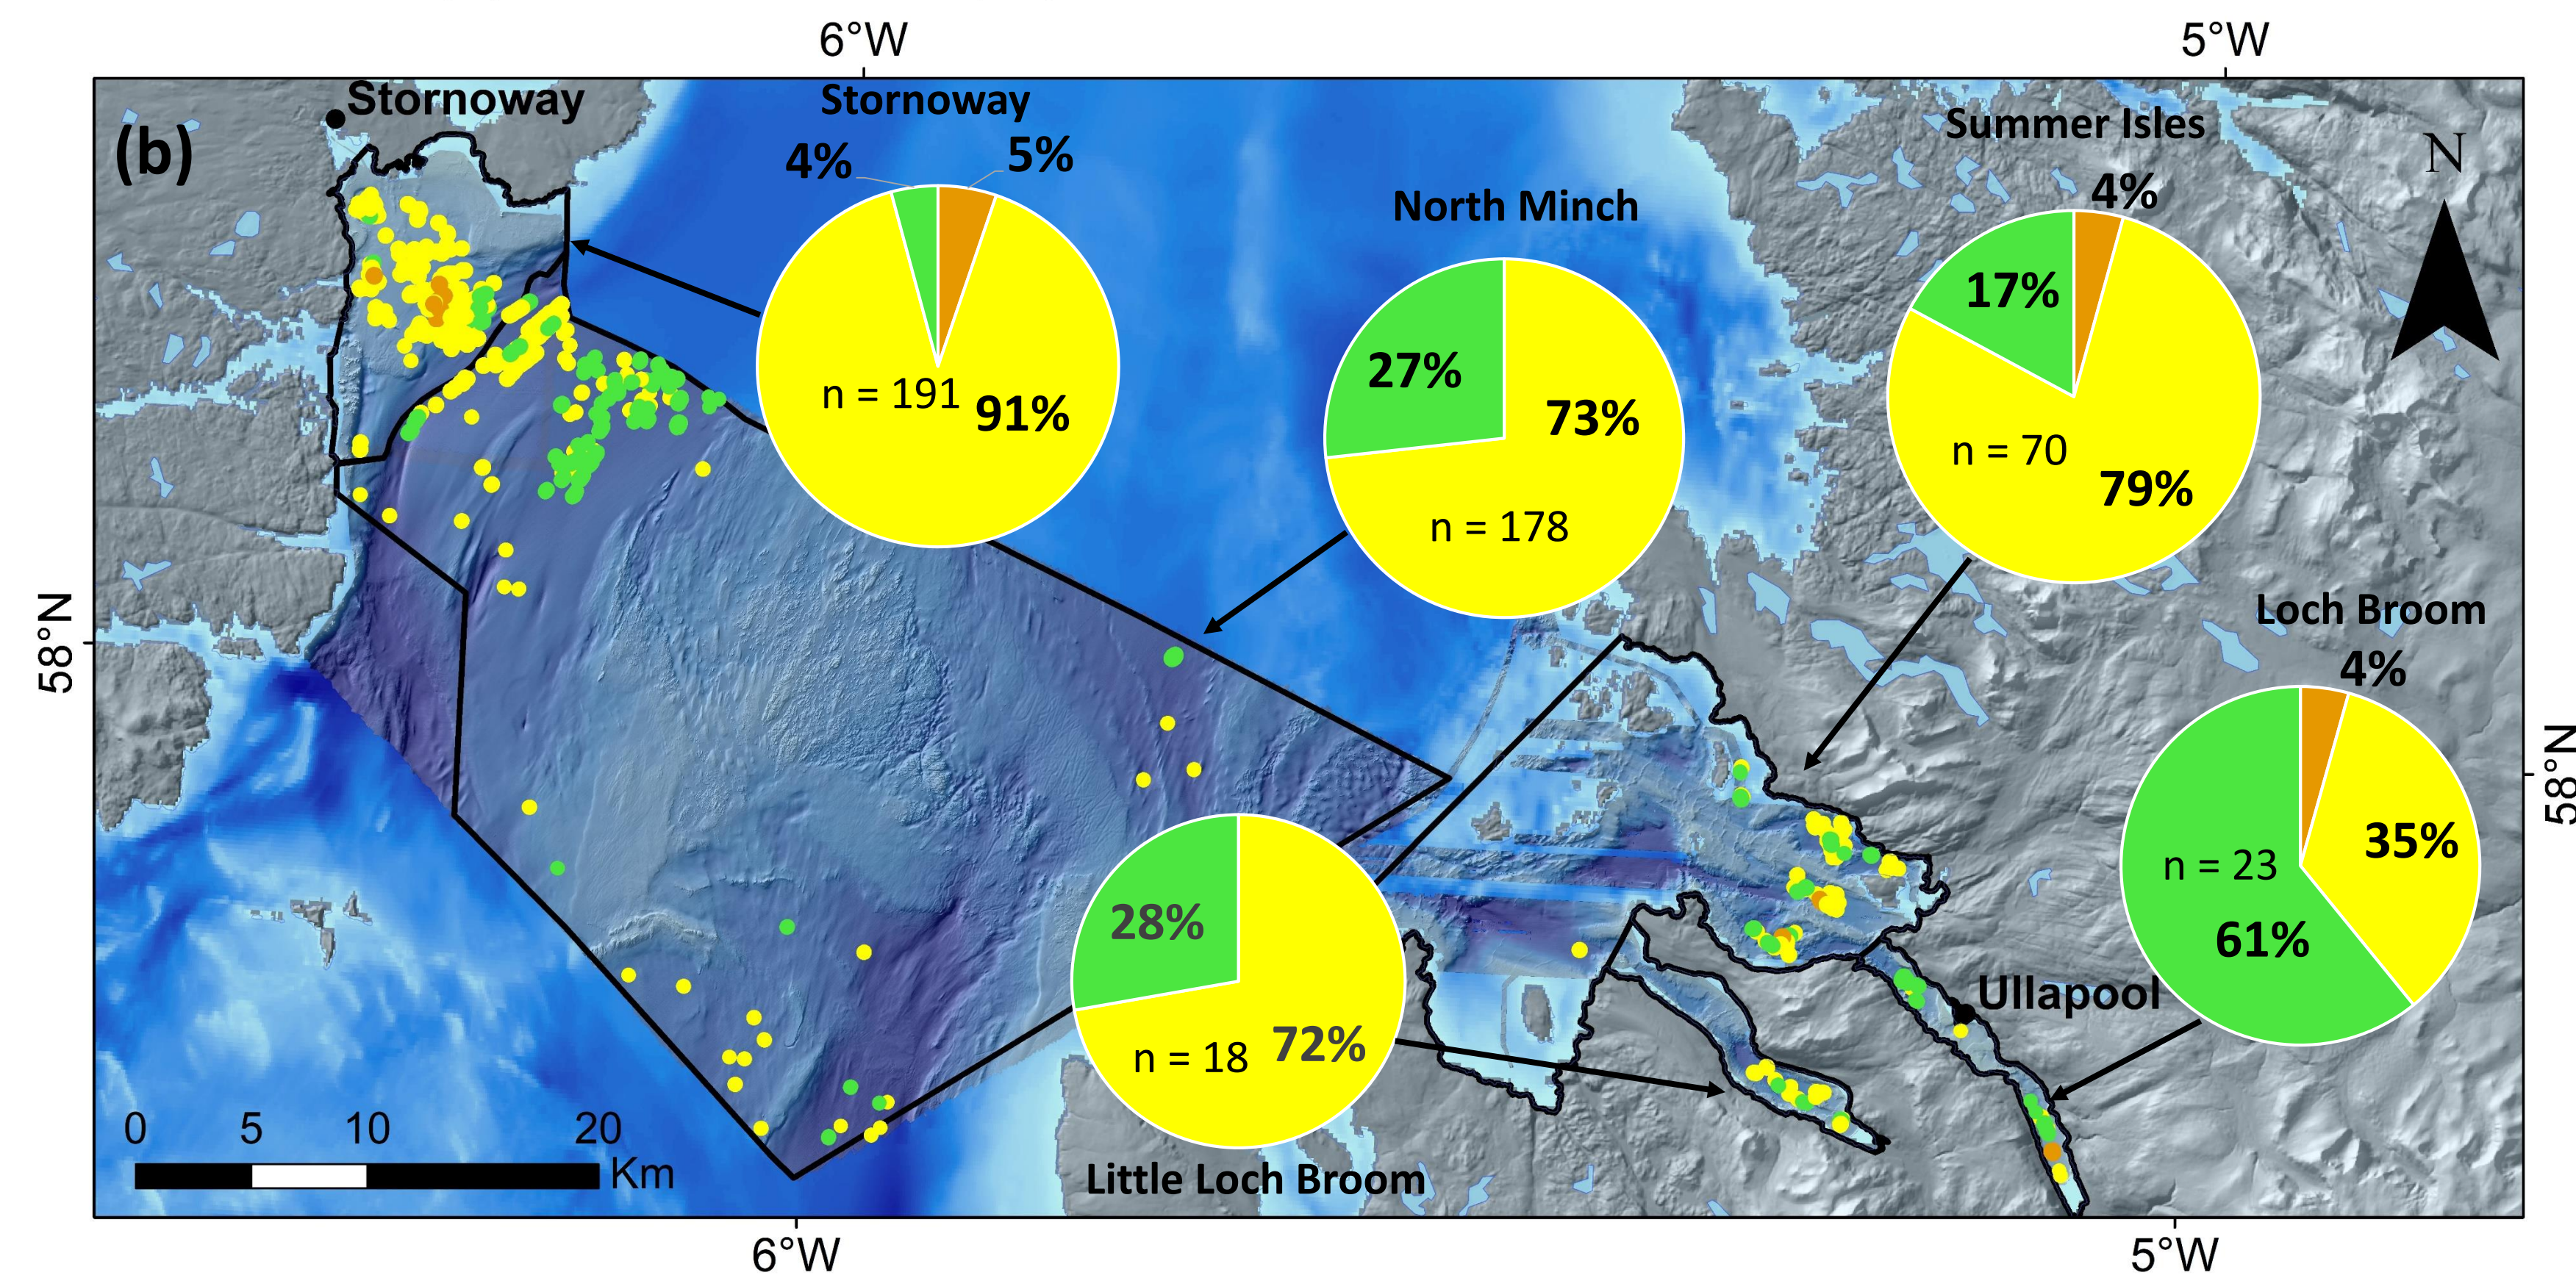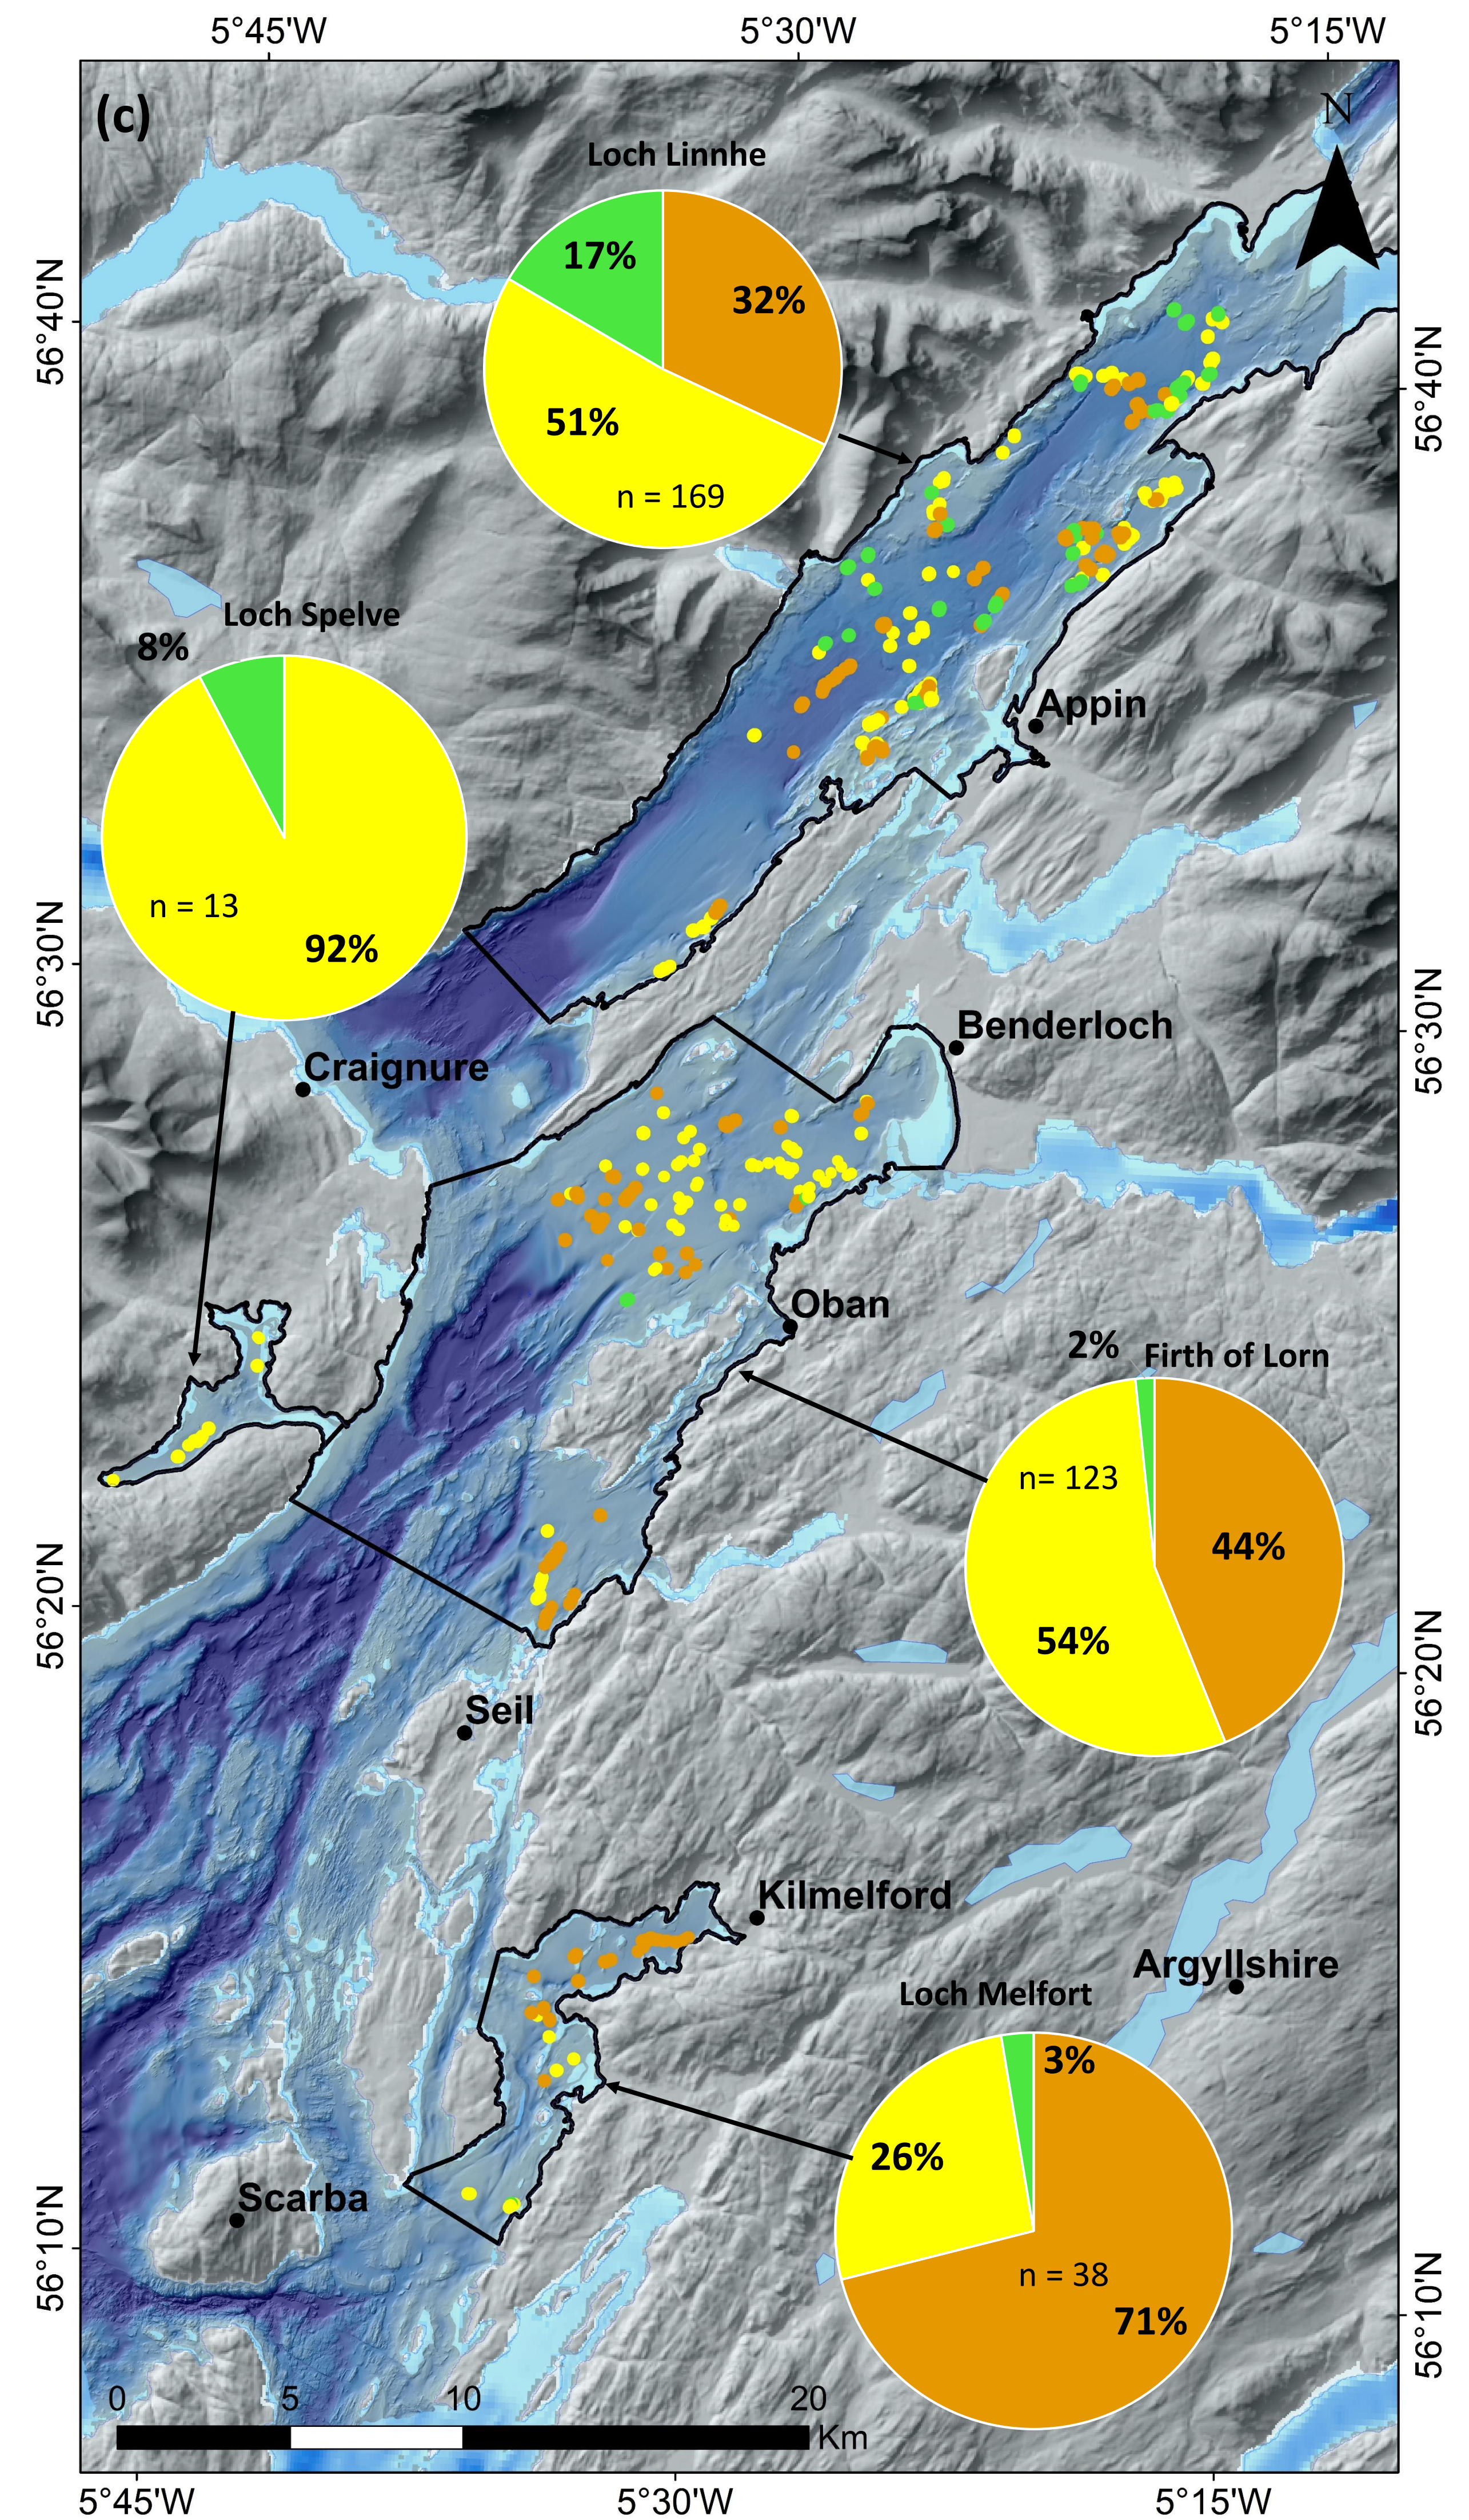

Supplement: Supplementary file 1 [file 18004283]
